# Supplementary material for: Tumor microenvironment-activated theranostic nanoreactor for NIR-II Photoacoustic imaging-guided tumor-specific photothermal therapy
Source: PubMed Central journal article supplement — Fundam Res. 2022 May 15;4(1):178–87. doi: 10.1016/j.fmre.2022.04.021 (PMC11197737; doi:10.1016/j.fmre.2022.04.021), 2022-05-15

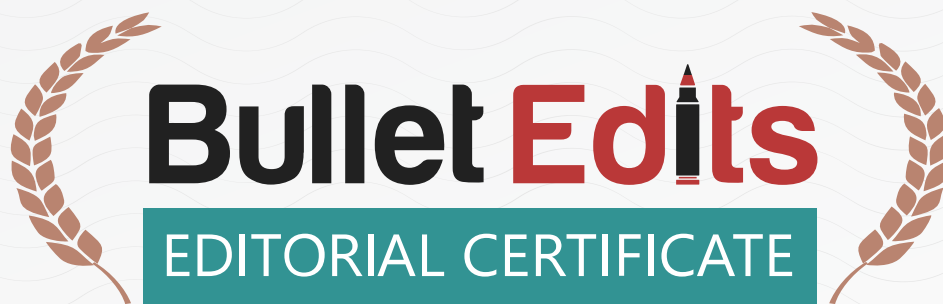

This document certifies that the paper listed below was edited and proofread for proper English language, grammar, punctuation, spelling, and overall style by one or more than one highly qualified native speakers at Bullet Edits. All of the suggested amendments were tracked with the Microsoft Word "Track Changes" feature. Therefore, the author had the option to reject or accept each change individually.

### Manuscript Title:

Tumor Microenvironment-Activated Theranostic Nanoreactor for NIR-II Photoacoustic Imaging Guided Specific Photothermal Therapy

### Anti-counterfeiting Code:

97c3105a25eb2cb19933b75054fd10ad

### Date Issued:

2022-04-07 22:15:18

Bullet Edits is a registered company headquartered in the UK with a global presence.

We offer a range of editing, proofreading services to authors. Our Ph.D. editors are all native English speakers from the USA and UK. Authors who work with Bullet Edits are guaranteed excellent language quality and timely delivery.

Address: BULLET EDITS LIMITED, 85 Great Portland Street, London, UK

Tel: UK. (+44)20457 70286 / US. (+1)312-313-9179

Web: [www.bulletedits.cn](http://www.bulletedits.cn)/Email: [info@bulletedits.cn](mailto:info@bulletedits.cn)

VAT: GB 378 9316 43

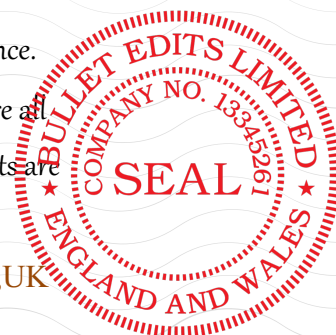

Supplement: mmc1.pdf [file mmc1.pdf]
